# Supplementary material for: Benefit Of Vitrectomy And Internal Limiting Membrane Peeling In The Treatment Of Resistant Diabetic Macular Edema
Source: Research Square preprint supplement (doi:10.21203/rs.3.rs-264766/v1), 2021-04-02
Supplement: Supplementary file 1 [file 37a08cf9615b887bd45ca283.docx]

| **Table 1:** Demographic characteristics of patients in groups | | | | | | | | | | | | | |
| --- | --- | --- | --- | --- | --- | --- | --- | --- | --- | --- | --- | --- | --- |
|  |  | **Group 1**  **(ILM non-peeled)** | | | |  | **Group 2**  **(ILM peeled)** | | | | p | | |
|  | Mean±SD/n-% | | | Mean |  | Mean±SD/n-% | | | Mean |
| Age (year) | | 57.5 | ± | 5.4 | 57.0 |  | 56.9 | ± | 5.8 | 56.0 | 0.924 | m |
| Gender | Male | 9 |  | 45.0% |  |  | 6 |  | 30.0% |  | 0.327 | X² |
| Female | 11 |  | 55.0% |  |  | 14 |  | 70.0% |  |
| m Mann-Whitney u test / X²  Chi-square test / SD standard deviation / n number / ILM internal limiting membrane | | | | | | | | | | | | | |
