# Supplementary material for: Benefit Of Vitrectomy And Internal Limiting Membrane Peeling In The Treatment Of Resistant Diabetic Macular Edema
Source: Research Square preprint supplement (doi:10.21203/rs.3.rs-264766/v1), 2021-04-02
Supplement: Supplementary file 3 [file f199253a58fe6d54c2e97048.docx]

| **Table 2:** The number of intravitreal drug injections to groups | | | | | | | | | | | | | |
| --- | --- | --- | --- | --- | --- | --- | --- | --- | --- | --- | --- | --- | --- |
|  |  | **Group 1**  **(ILM non-peeled)** | | | |  | **Group 2**  **(ILM peeled)** | | | | p | | |
|  | Mean±SD/n-% | | | Mean |  | Mean±SD/n-% | | | Mean |
| Before PPV anti-VEGF (n) | | 3.85 | ± | 0.81 | 4.00 |  | 4.00 | ± | 0.86 | 4.00 | 0.549 | m |
| Before PPV IVD (n) | | 1.25 | ± | 0.79 | 1.00 |  | 1.35 | ± | 0.67 | 1.00 | 0.695 | m |
| Postoperative IVD (n) | | 0.55 | ± | 0.69 | 0.00 |  | 0.10 | ± | 0.31 | 0.00 | 0.012 | m |
| m Mann-Whitney U test / n number / VEGF vascular endothelial growth factor / IVD intravitreal dexamethasone / PPV pars plana vitrectomy / ILM internal limiting membrane | | | | | | | | | | | |  | |
