# Supplementary material for: Benefit Of Vitrectomy And Internal Limiting Membrane Peeling In The Treatment Of Resistant Diabetic Macular Edema
Source: Research Square preprint supplement (doi:10.21203/rs.3.rs-264766/v1), 2021-04-02
Supplement: Supplementary file 4 [file ef5fb09a6b4d2545187451dc.docx]

| **Table 3:** The best corrected visual acuity (BCVA) of the groups | | | | | | | | | | | | |
| --- | --- | --- | --- | --- | --- | --- | --- | --- | --- | --- | --- | --- |
|  |  | **Group 1**  **(ILM non-peeled)** | | | |  | **Group 2**  **(ILM peeled)** | | | | p | |
|  | Mean±SD/n-% | | | Mean |  | Mean±SD/n-% | | | Mean |
| **BCVA (LogMar)** | |  |  |  |  |  |  |  |  |  |  |  |
| Before PPV | | 0.88 | ± | 0.29 | 1.00 |  | 0.90 | ± | 0.27 | 1.00 | 0.822 | m |
| Postoperative 1st month | | 0.69 | ± | 0.15 | 0.69 |  | 0.38 | ± | 0.14 | 0.39 | 0.000 | m |
| Postoperative 3rd month | | 0.52 | ± | 0.17 | 0.52 |  | 0.37 | ± | 0.14 | 0.35 | 0.004 | m |
| Postoperative 6th month | | 0.32 | ± | 0.15 | 0.30 |  | 0.24 | ± | 0.18 | 0.15 | 0.023 | m |
| Postoperative 9th month | | 0.25 | ± | 0.09 | 0.22 |  | 0.15 | ± | 0.07 | 0.15 | 0.000 | m |
| Postoperative 12th month | | 0.22 | ± | 0.09 | 0.22 |  | 0.14 | ± | 0.06 | 0.15 | 0.000 | m |
|  | | | | | | | | | | | | |
| m Mann-whitney u test / SD standard deviation / n number / PPV pars plana vitrectomy / ILM internal limiting membrane | | | | | | | | | | | |  |
